# Supplementary material
Source: HighWire-hosted journal article supplement (https://bmjopen.bmj.com/content/9/1/e024696)
Supplement: inline-supplementary-material-2 [file inline-supplementary-material-2.pdf]

**Supplementary File 2– SF-36 domain scores over time**

|                                            | Baseline                      |                               |                        |      | Mean change after 6 mo follow-up |                               |                        |   | Mean change after 2 yr follow-up |                               |                        |  |
|--------------------------------------------|-------------------------------|-------------------------------|------------------------|------|----------------------------------|-------------------------------|------------------------|---|----------------------------------|-------------------------------|------------------------|--|
| <i>SF-36 domains:</i>                      | Screen positive and CI (n=39) | Screen positive, no CI (n=56) | Screen negative (n=84) |      | Screen positive and CI (n=39)    | Screen positive, no CI (n=56) | Screen negative (n=84) |   | Screen positive and CI (n=39)    | Screen positive, no CI (n=56) | Screen negative (n=84) |  |
| Physical functioning                       | 52.4 ±28.1                    | 60.5±24.0                     | 72.0±25.1              | a, b | -0.4±13.4                        | +2.3±15.5                     | -7.2±14.0              | b | -8.2±16.9                        | -8.2 ±23.4                    | -10.4 ±14.2            |  |
| Role limitations due to physical problems  | 50.6±40.8                     | 66.9±39.2                     | 75.0±36.6              | a    | -4.4±31.1                        | -1.0±54.1                     | -8.2 ±35.0             |   | -9.2±36.8                        | -                             | -16.4±38.3             |  |
| Bodily Pain                                | 69.2±26.0                     | 71.7±25.1                     | 75.9±22.1              |      | -5.7±20.8                        | +7.7±24.2                     | -0.2 ±18.9             | c | -5.0 ±24.7                       | -1.8 ±26.6                    | -3.7 ±21.1             |  |
| General Health                             | 54.9±17.6                     | 56.0±16.8                     | 61.5±19.8              |      | -1.9±32.3                        | +4.3±14.9                     | -1.3±17.1              |   | -5.3 ±15.9                       | -0.1±19.6                     | -2.7±14.1              |  |
| Vitality                                   | 57.8±22.3                     | 63.5±17.6                     | 71.4±16.9              | a    | -4.5±13.6                        | -0.3±16.6                     | -3.8 ±16.9             |   | -7.0 ±19.3                       | -6.5 ±20.0                    | -7.3 ±13.4             |  |
| Social functioning                         | 73.7±19.4                     | 78.1±21.0                     | 84.4±16.5              | a    | -5.4±15.8                        | +0.9 ±21.3                    | -1.4±20.3              |   | -10.3±22.7                       | -                             | -6.3±20.9              |  |
| Role limitations due to emotional problems | 66.7±40.8                     | 80.0±36.1                     | 87.6±27.9              | a    | -2.0±43.4                        | +0.7 ±41.8                    | -3.5±34.4              |   | -8.0±45.1                        | -7.4±38.2                     | -3.9±24.8              |  |
| Mental Health                              | 74.1±16.1                     | 80.3±14.7                     | 82.2±12.9              | a    | -6.8±15.1                        | -0.2±14.8                     | -0.6 ±10.7             | a | -3.0 ±15.9                       | -0.1 ±19.6                    | -2.7 ±14.1             |  |

Data are presented as means ± standard deviation.

a = p < 0.05 for difference in (change) score between screen positives with CI and screen negatives.

b = p < 0.05 for difference in (change) score between screen positives without CI and screen negatives.

c = p < 0.05 for difference in (change) score between screen positives with CI and screen positives without CI.
